# Supplementary material
Source: HighWire-hosted journal article supplement (https://erj.ersjournals.com/content/57/4/2001160)
Supplement: inline-supplementary-material-1 [file inline-supplementary-material-1.pdf]

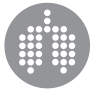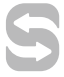

SHAREABLE PDF

# Clinical phenotypes of extrapulmonary sarcoidosis: an analysis of a French, multi-ethnic, multicentre cohort

Raphael Lhote<sup>1,2</sup>, Isabella Annesi-Maesano<sup>1</sup>, Hilario Nunes<sup>3</sup>, David Launay<sup>4</sup>, Raphael Borie<sup>5</sup>, Karim Sacré<sup>6</sup>, Nicolas Schleinitz<sup>7</sup>, Mohamed Hamidou<sup>8</sup>, Matthieu Mahevas<sup>9</sup>, Hervé Devilliers<sup>10</sup>, Philippe Bonniaud<sup>11</sup>, François Lhote<sup>12</sup>, Julien Haroche<sup>2</sup>, Pierre Rufat<sup>13</sup>, Zahir Amoura<sup>2</sup>, Dominique Valeyre<sup>3</sup> and Fleur Cohen Aubart<sup>2</sup>

**Affiliations:** <sup>1</sup>Epidémiologie des Maladies Allergiques et Respiratoires (EPAR), Faculté de Médecine Saint-Antoine, Sorbonne Université, Institut Pierre Louis d'Epidémiologie et de Santé Publique (IPLESP UMRS 1136), Paris, France. <sup>2</sup>Service de Médecine Interne 2, Centre National de Référence Maladies Systémiques Rares, Lupus et Syndrome des Anticorps Antiphospholipides, Centre National de Référence Histiocytoses, Sorbonne Université, Assistance Publique Hôpitaux de Paris, Hôpital de la Pitié-Salpêtrière, Paris, France. <sup>3</sup>Service de Pneumologie, Assistance Publique Hôpitaux de Paris, Hôpital Avicenne, Bobigny, France. <sup>4</sup>Dépt de Médecine Interne et Immunologie Clinique, Centre de Référence des Maladies Auto-immunes Systémiques Rares du Nord et du Nord-Ouest de France (CeRAINO), Université de Lille, INSERM U995 – LIRIC – Lille Inflammation Research International Center, CHRU de Lille, Lille, France. <sup>5</sup>Service de Pneumologie A, INSERM U1152, Université Paris Diderot, Assistance Publique Hôpitaux de Paris, Hôpital Bichat, Paris, France. <sup>6</sup>Service de Médecine Interne, Université Paris Diderot, Assistance Publique Hôpitaux de Paris, Hôpital Bichat, Paris, France. <sup>7</sup>Service de Médecine Interne, Université Aix Marseille, Assistance Publique Hôpitaux de Marseille, Hôpital de la Timone, Marseille, France. <sup>8</sup>Service de Médecine Interne, Université de Nantes, Centre Hospitalier Universitaire, Nantes, France. <sup>9</sup>Service de Médecine Interne, Assistance Publique Hôpitaux de Paris, Hôpital Mondor, Créteil, France. <sup>10</sup>Service de Médecine Interne 2, Centre Hospitalier Dijon-Bourgogne, Dijon, France. <sup>11</sup>Service de Pneumologie et Soins Intensifs Respiratoires, Centre de Référence Constitutif des Maladies Pulmonaires Rares de l'Adulte, Centre Hospitalier Dijon-Bourgogne, Dijon, France. <sup>12</sup>Service de Médecine Interne, Hôpital Delafontaine, St-Denis, France. <sup>13</sup>Dépt d'Information Médicale et Biostatistiques, Sorbonne Université, Assistance Publique Hôpitaux de Paris, Hôpital de la Pitié-Salpêtrière, Paris, France.

**Correspondence:** Fleur Cohen Aubart, Service de Médecine Interne 2, Groupe Hospitalier Pitié-Salpêtrière, 47-83 Boulevard de l'Hôpital, 75 651 Paris Cedex 13, France. E-mail: fleur.cohen@aphp.fr

@ERSpublications

**There are five distinct phenotypes of sarcoidosis, with a non-random distribution of organ involvement. These five phenotypes differ according to sex, geographical origin and socioprofessional category.** <https://bit.ly/3iCurZK>

**Cite this article as:** Lhote R, Annesi-Maesano I, Nunes H, *et al.* Clinical phenotypes of extrapulmonary sarcoidosis: an analysis of a French, multi-ethnic, multicentre cohort. *Eur Respir J* 2021; 57: 2001160 [<https://doi.org/10.1183/13993003.01160-2020>].

This single-page version can be shared freely online.

**ABSTRACT** Sarcoidosis is a rare disease of unknown cause with wide heterogeneity in clinical features and outcomes. We aimed to explore sarcoidosis phenotypes and their clinical relevance with particular attention to extrapulmonary subgroups.

The Epidemiology of Sarcoidosis (EpiSarc) study is a French retrospective multicentre study. Sarcoidosis patients were identified through national hospitalisation records using appropriate codes from 11 hospital centres between 2013 and 2016 according to a standardised protocol. Medical charts were reviewed. The phenotypes of sarcoidosis were defined using a hierarchical cluster analysis.

A total of 1237 patients were included (562 men and 675 women). The mean age at sarcoidosis diagnosis was  $43.5 \pm 13$  years. Hierarchical cluster analysis identified five distinct phenotypes according to organ involvement and disease type and symptoms: 1) erythema nodosum, joint involvement and hilar lymph nodes (n=180); 2) eye, neurological, digestive and kidney involvement (n=137); 3) pulmonary involvement with fibrosis and heart involvement (n=630); 4) lupus pernio and a high percentage of severe involvement (n=41); and 5) hepatosplenic, peripheral lymph node and bone involvement (n=249). Phenotype 1 was associated with being European/Caucasian and female and with non-manual work, phenotype 2 with being European/Caucasian, and phenotypes 3 and 5 with being non-European/Caucasian. The labour worker proportion was significantly lower in phenotype 5 than in the other phenotypes.

This multicentre study confirms the existence of distinct phenotypes of sarcoidosis, with a non-random distribution of organ involvement. These phenotypes differ according to sex, geographical origin and socioprofessional category.
